1 **Title:** Gender differences in PTSD severity and pain outcomes: baseline results from the LAMP trial

2 **Authors:** Friedman JK,<sup>1,2</sup> Taylor BC,<sup>1,2</sup> Hagel Campbell E,<sup>1</sup> Allen K,<sup>4,5</sup> Bangerter A,<sup>1</sup> Branson M,<sup>1</sup>  
3 Bronfort G,<sup>3,8</sup> Calvert C,<sup>1,2</sup> Cross LJS,<sup>1</sup> Driscoll M,<sup>6,7</sup> Evans R,<sup>3,8</sup> Ferguson JE,<sup>2</sup> Haley A,<sup>3,8</sup> Hennessy S,<sup>1</sup>  
4 Meis LA,<sup>1,2,9</sup> Burgess DJ.<sup>1,2</sup>

5

6 <sup>1</sup>Center for Care Delivery and Outcomes Research, Minneapolis Veterans Affairs Healthcare System  
7 (MVAHCS), Minneapolis, MN

8 <sup>2</sup>University of Minnesota Medical School, Minneapolis, MN

9 <sup>3</sup>Integrative Health & Wellbeing Research Program, Bakken Center for Spirituality & Healing, University  
10 of Minnesota, Minneapolis, MN

11 <sup>4</sup>Center of Innovation to Accelerate Discovery and Practice Transformation, Durham VAHCS, Durham,  
12 NC

13 <sup>5</sup>Thurston Arthritis Research Center, University of North Carolina at Chapel Hill, Chapel Hill, NC

14 <sup>6</sup>VA Connecticut Healthcare System, West Haven, CT

15 <sup>7</sup>Yale School of Medicine, New Haven, CT

16 <sup>8</sup>University of Minnesota School of Nursing, Minneapolis, MN

17 <sup>9</sup>Women's Health Sciences Division, National Center for PTSD, Boston, MA

18

19 **Corresponding author:** Jessica K. Friedman, [jessica.friedman@va.gov](mailto:jessica.friedman@va.gov)

20

21 **Keywords:** Chronic Pain, Gender differences, Veterans, Post-traumatic stress disorder

22

## 23 **Disclosures**

## 24 **Conflicts of Interest**

25 The authors declare that they have no conflicts of interest to disclose.

26

## 27 **Acknowledgements**

28 The U.S. Army Medical Research Acquisition Activity, 820 Chandler Street, Fort Detrick MD 21702-  
29 5014 is the awarding and administering acquisition office. This work was supported by the Assistant  
30 Secretary of Defense for Health Affairs endorsed by the Department of Defense, through the Pain  
31 Management Collaboratory - Pragmatic Clinical Trials Demonstration Projects under Award No.  
32 W81XWH-18-2-0003. Research reported in this publication was supported by Grant Number  
33 U24AT009769 from the National Center for Complementary and Integrative Health (NCCIH), and the  
34 Office of Behavioral and Social Sciences Research (OBSSR). This material is the result of work

35 supported with resources at the Minneapolis VA Health Care System, Durham VA Health Care System,  
36 and VA Greater Los Angeles Healthcare System. For more information about the Collaboratory, visit  
37 <https://painmanagementcollaboratory.org/>.

38 **Abstract**

39 **Background:** Post-traumatic stress disorder (PTSD) and chronic pain are highly prevalent  
40 comorbid conditions. Veterans dually burdened by PTSD and chronic pain experience more  
41 severe outcomes compared to either disorder alone. Few studies have enrolled enough women  
42 Veterans to test gender differences in pain outcomes [catastrophizing, intensity, interference] by  
43 the severity of PTSD.

44 **Aim:** Examine gender differences in the association between PTSD symptoms and pain  
45 outcomes among Veterans enrolled in a chronic pain clinical trial.

46 **Methods.** Participants were 421 men and 386 women Veterans with chronic pain who provided  
47 complete data on PTSD symptoms and pain outcomes. We used hierarchical linear regression  
48 models to examine gender differences in pain outcomes by PTSD symptoms.

49 **Results.** Adjusted multivariable models indicated that PTSD symptoms were associated with  
50 higher levels of pain catastrophizing (0.57, 95% CI [0.51, 0.63]), pain intensity (0.30, 95% CI  
51 [0.24, 0.37]), and pain interference (0.46, 95% CI [0.39, 0.52]). No evidence suggesting  
52 differences in this association were found in either the crude or adjusted models (all interaction  
53 p-values<0.05).

54 **Conclusion:** These findings may reflect the underlying mutual maintenance of these conditions  
55 whereby the sensation of pain could trigger PTSD symptoms, particularly if the trauma and pain  
56 are associated with the same event. Clinical implications and opportunities testing relevant  
57 treatments that may benefit both chronic pain and PTSD are discussed.

58

## 59 **Background**

60 Post-traumatic stress disorder (PTSD) and chronic pain are highly prevalent comorbid conditions  
61 that affect the health and well-being of U.S Veterans (1,2). Those dually burdened by PTSD and chronic  
62 pain may experience more severe psychiatric functional impairments and greater health care utilization  
63 than those with either disorder alone (3–5). Women Veterans, the fastest growing demographic of  
64 Veterans, experience disproportionately high rates of PTSD, 13%, compared to 6% of men Veterans, and  
65 between 11-78% experience chronic pain, compared to 9-50% of men Veterans (6–10). Despite the  
66 growing body of knowledge on comorbid PTSD and chronic pain, few studies have enrolled enough  
67 women Veterans to test gender differences in pain outcomes (pain catastrophizing, interference, and  
68 intensity) in relation to PTSD symptoms. Understanding the potential gender variation in the severity of  
69 chronic pain outcomes associated with PTSD symptoms has implications for developing gender-sensitive  
70 assessment tools and treatment modalities for Veterans with PTSD and chronic pain.

71 Chronic pain is defined as pain lasting longer than three consecutive months and is associated  
72 with decreased quality of life, increased medical costs, and increased substance use (11–14). In addition  
73 to the higher musculoskeletal pain reported by women Veterans, they are more likely to report moderate  
74 or severe chronic pain (15,16). At least one study found that women Veterans experienced greater pain  
75 intensity, decreased physical functioning, and more affective distress despite reporting better self-  
76 perceived health than men (17). Additionally, gender role expectations and societal norms may influence  
77 how individuals perceive and communicate their pain experiences, potentially contributing to reported  
78 disparities in clinical pain assessment, diagnosis, and offered treatment modalities (18–20). Finally,  
79 previous studies have revealed higher pain catastrophizing, interference and intensity levels in Veteran  
80 and civilian women compared to Veteran and civilian men (21,22).

81 PTSD is a mental health disorder that may develop after experiencing or witnessing a traumatic  
82 event and then subsequently developing a pattern of symptoms, including intrusion, avoidance, negative  
83 cognitions, and mood, or alterations in arousal and reactivity(23). It is associated with an increased risk of

84 additional mental health diagnoses, although most people who experience traumatic events do not  
85 ultimately develop PTSD. Men Veterans report proportionally more combat-related exposures linked to  
86 PTSD symptoms (24). However, women Veterans who served in post-9/11 combat zones, such as Iraq  
87 and Afghanistan, report similar levels of perceived threat in the war zone as men (25,26). Women  
88 Veterans also report a higher incidence of trauma exposures across the life course, including adverse  
89 childhood experiences, military sexual trauma, and adult interpersonal violence, which may result in  
90 higher rates of PTSD compared to civilian women (16,27).

91 Comorbid chronic pain and PTSD frequently co-occur in civilian and Veteran populations and are  
92 thought to have a bidirectional and mutually reinforcing relationship (28,29). Chronic pain and PTSD are  
93 thought to share common underlying mechanisms. The shared vulnerability and mutual maintenance  
94 theories have been used to explain the co-morbidity of these conditions. The shared vulnerability theory  
95 posits that people with comorbid PTSD and chronic pain share common factors, such as anxiety  
96 sensitivity, attentional bias, autonomic arousal, and psychobiological dysregulation, predisposing them to  
97 one or both conditions (28). The mutual maintenance model posits that in addition to shared vulnerability  
98 factors (e.g., attentional biases, anxiety sensitivity), PTSD and chronic pain may exacerbate and reinforce  
99 each other (29). This bidirectional influence may result in the experience of pain-related exacerbation of  
100 PTSD symptoms by retriggering recollections of painful injuries sustained during the traumatic event.  
101 Conversely, elevated PTSD symptoms may activate the body's stress response and the experience of  
102 increased pain. The co-morbidity of chronic pain and PTSD has been found in treatment-seeking samples  
103 of PTSD and chronic pain patients (1,28). This mechanism has been well studied in predominantly male  
104 Veteran (30) and civilian (31) samples, which may obscure important differences in the manifestation and  
105 severity. While the findings of studies using Veteran samples support the central tenant of the mutual  
106 maintenance model, namely the mutually reinforcing and exacerbating influence of PTSD on chronic pain  
107 outcomes, very few have had adequate numbers of men and women Veterans to identify differential

108 effects by gender (32). The current study assesses whether gender differences exist in association between  
109 PTSD symptoms and pain outcomes in a comparative sample of men and women Veterans.

110 This manuscript reports the associations between probable PTSD symptoms and three dimensions  
111 of chronic pain outcomes: pain catastrophizing (negative thinking about one's pain), pain intensity (how  
112 strong the pain feels), and pain interference (how one experiences pain, pain interference with daily  
113 activities), in a sample of U.S. Veterans diagnosed with a chronic pain condition. Specifically, we  
114 assessed gender differences in the association between probable PTSD and chronic pain outcomes. Based  
115 on the higher prevalence of both PTSD and chronic pain among women Veterans, the study team  
116 hypothesized that gender differences would be present across strata of probable PTSD and chronic pain  
117 outcomes. This study extends previous research on the associations between PTSD and chronic pain due  
118 to the unique gender composition of our data, which includes approximately equal numbers of men and  
119 women Veterans with chronic pain.

## 120 **Methods**

### 121 **Study design and sample**

122 This is a secondary analysis of Veterans randomized for participation in the Learning to Apply  
123 Mindfulness to Pain (LAMP) study ( $n=811$ ). The LAMP study was a three-arm, multi-site, randomized  
124 pragmatic trial designed to assess the efficacy of multimodal delivery of two mindfulness-based  
125 interventions compared to usual care for Veterans with chronic pain at one of the three participating sites.  
126 Participants were recruited from the Minneapolis, Durham, and Greater Los Angeles Veterans Affairs  
127 Healthcare Systems. To be eligible, participants needed to have: 1) at least two qualifying pain diagnoses  
128 within the same pain category on at least two separate occasions at least 90 days apart during the previous  
129 two years documented in their electronic health record (EHR), 2) a pain duration of at least six months, a  
130 pain severity score of at least four during the previous week on a Likert scale of 0-10, and 3) access to a  
131 smartphone and the internet. Participants were excluded if they had: 1) new diagnoses of schizophrenia,

132 bipolar disorder, major depressive disorder, current psychotic symptoms, suicidality, or other psychosis  
133 within the past 18 months (assessed by chart review); or 2) were currently enrolled in another pain study  
134 or a Mindfulness-Based Stress Reduction (MBSR) program (assessed by survey). Participants were  
135 recruited between November 4, 2020 and May 25, 2022. Participants provided verbal consent, which was  
136 recorded in the study tracking database by the study recruitment coordinator. Additional study details are  
137 described in the protocol paper (33).

138           Of the participants ( $n=1945$ ) who met eligibility criteria, 1,737 completed the baseline survey,  
139 and 811 were randomized to one of the intervention arms. Due to an a priori study aim to examine gender  
140 differences, women were oversampled and comprised 48% of participants.

## 141 **Measures**

### 142 **Predictors**

143 *PTSD symptoms* were assessed using the PTSD Checklist for *Diagnostic and Statistical Manual of*  
144 *Mental Disorders-Fifth Edition* (PCL-5) (34). The PCL-5 is a 20-item self-report measure that assesses  
145 the presence and severity of PTSD symptoms over the past month (range, 0-80). Respondents are asked to  
146 rate how bothered they have been by each of the 20 items on a five-point Likert scale. Response options  
147 for all items are: “Not at all” (0), “A little bit” (1), “Moderately” (2), “Quite a bit” (3), or “Extremely” (4).  
148 Items are summed with scores of 31 or higher, indicating probable PTSD and a need for additional  
149 clinical assessment or PTSD treatment (35). PCL-5 scores were standardized and parameterized as  
150 continuous in the analysis.

### 151 **Outcomes**

152 *Pain Catastrophizing* was assessed using the Pain Catastrophizing Scale (PCS) (36). The PCS is a 13-  
153 item self-report instrument that asks respondents to reflect on past painful experiences and indicate their  
154 thoughts and feelings in response to pain (range, 0-52). Response options for all items are: “Not at all”  
155 (0), “To a slight degree” (1), “To a moderate degree” (2), “To a great degree” (3), or “All the time” (4).

156 Items are summed with scores of 30 or higher, representing a clinically significant level of pain  
157 catastrophizing (36). PCS scores were standardized and parameterized as continuous in analysis.  
158 *Pain intensity and interference.* The Brief Pain Inventory (BPI) subscales were used to assess participant  
159 experiences of pain intensity (range, 0-10) and interference (range, 0-10) during the past week (37,38).  
160 Pain interference was assessed by seven items asking the extent to which pain interferes with general  
161 activity, mood, walking ability, normal work, relations with other persons, sleep, and enjoyment of life on  
162 an 11-point numeric rating scale from “Does not interfere” (0) to “Completely interferes” (10). Pain  
163 intensity was assessed by four items asking participants to rate their worst, least, average, and current pain  
164 severity for the past 1 month on an 11-point numeric rating scale from “No pain” (0) to “Pain as bad as  
165 you can imagine” (10). BPI subscale scores were standardized and parameterized as continuous in  
166 analysis (39).

#### 167 **Covariates**

168 *Gender* was identified by self-report on the study screening questionnaire. Answer options included: man,  
169 woman, another gender, and decline to answer. Participants who identified as either “another gender” or  
170 “decline to answer” were then re-coded for analysis using their administrative birth-sex as reported in  
171 EHR.

172 *Sociodemographic* variables included self-identified racial identity (“White,” “African American or  
173 Black,” “American Indian/Alaskan Native,” “Asian,” Native Hawaiian/Pacific Islander,” and  
174 “Multiracial”); ethnicity (“Hispanic or Latino” and “Not Hispanic or Latino”), highest level of  
175 educational attainment (“High school or less,” “Some college,” “Bachelor’s degree,” and “Master’s  
176 degree or beyond”), and age. The patient facility where participants were recruited (Minneapolis,  
177 Durham, or Greater Los Angeles VA Medical Centers) was also included in adjusted models.

#### 178 **Analysis**



179 First, we conducted descriptive analyses summarizing distributions of all variables overall and  
180 stratified by gender identity (Table 1). Crude and sociodemographic adjusted linear regression models  
181 were used to quantify the association between PTSD symptoms and each pain outcome (pain  
182 catastrophizing, intensity, and interference). We fit two sets of models (crude and adjusted) models to  
183 assess the association between PTSD symptoms and each pain outcome. We additionally assessed effect  
184 measure modification by gender (whether the association between PTSD symptoms and each pain  
185 outcome differed by gender identity) by adding an interaction term to each model. Due to differences in  
186 the scale range of all outcomes, all estimates were standardized to represent the number of standard  
187 deviations of change in each pain outcome associated with a one standard deviation change in the  
188 exposure variable, PTSD symptoms. Statistical significance was assessed at alpha level  $p < 0.05$ . All  
189 statistical analyses were conducted using Stata 17 (College Station, TX).

## 190 Results

### 191 Participant Characteristics

192 A total of 807 participants provided complete data on PTSD, pain catastrophizing, pain intensity,  
193 and pain interference on the baseline survey ( $n=807/811$ ). Women in our sample were more likely to be  
194 employed, have four-year or more advanced degrees, be a member of a racially minoritized group, and be  
195 younger compared to men. Mean and standard deviations of scores for all outcome variables are also  
196 shown in Table 1. Women reported statistically significant higher mean scores for all pain outcomes and  
197 PTSD symptoms compared to men.

| <b>Table 1. Demographic Characteristics</b> | Full sample (N=807) | Men (N=421) | Women (N=386) | p-value*   |
|---------------------------------------------|---------------------|-------------|---------------|------------|
| Age (Mean, sd)                              | 55 (12.9)           | 58 (12.6)   | 50 (11.8)     | $p < 0.05$ |
| <i>Racial Identity</i>                      |                     |             |               | $p < 0.05$ |
| African American/ Black                     | 207 (26%)           | 70 (17%)    | 137 (36%)     |            |
| American Indian/ Alaskan Native             | 9 (1%)              | 5 (1%)      | 4 (1%)        |            |
| Asian                                       | 6 (1%)              | 3 (0.75%)   | 3 (0.75%)     |            |
| Multiracial                                 | 35 (4%)             | 15 (4%)     | 20 (5%)       |            |

|                                                             |             |             |             |        |
|-------------------------------------------------------------|-------------|-------------|-------------|--------|
| Native Hawaiian/ Pacific Islander                           | 1 (0.1%)    | *           | 1 (0.25%)   |        |
| White                                                       | 545 (68%)   | 326 (78%)   | 219 (57%)   |        |
| <i>Ethnicity</i>                                            |             |             |             | p>0.05 |
| Hispanic or Latino                                          | 51 (6%)     | 21 (5%)     | 30 (8%)     |        |
| Not Hispanic or Latino                                      | 755 (94%)   | 400 (95%)   | 355 (92%)   |        |
| <i>Employment Status</i>                                    |             |             |             | p<0.05 |
| Working now                                                 | 333 (41%)   | 152 (36%)   | 181 (47%)   |        |
| Disabled                                                    | 174 (22%)   | 86 (20%)    | 88 (23%)    |        |
| Retired                                                     | 203 (25%)   | 142 (34%)   | 61 (16%)    |        |
| Other                                                       | 97 (12%)    | 41 (10%)    | 56 (15%)    |        |
| <i>Income</i>                                               |             |             |             | p>0.05 |
| Live comfortably                                            | 247 (31%)   | 133 (32%)   | 114 (30%)   |        |
| Meet your basic expenses with a little left over for extras | 343 (43%)   | 189 (45%)   | 154 (40%)   |        |
| Just meet your basic expenses                               | 187 (23%)   | 88 (21%)    | 99 (26%)    |        |
| Don't even have enough to meet basic expenses               | 30 (4%)     | 11 (3%)     | 19 (5%)     |        |
| <i>Education</i>                                            |             |             |             | p<0.05 |
| High school or less                                         | 53 (7%)     | 36 (9%)     | 17 (4%)     |        |
| Some college                                                | 353 (44%)   | 196 (47%)   | 157 (41%)   |        |
| Bachelor's degree                                           | 220 (27%)   | 109 (26%)   | 111 (29%)   |        |
| Master's degree or more advance education                   | 181 (22%)   | 80 (19%)    | 101 (26%)   |        |
| <b>Behavioral variables (Mean, SD)</b>                      |             |             |             |        |
| Brief Pain Inventory (BPI)- Interference (0-10)             | 5.6 (2.0)   | 5.4 (1.9)   | 5.8 (2.0)   | p<0.05 |
| Brief Pain Inventory (BPI)- Intensity (0-10)                | 5.5 (1.5)   | 5.4 (1.5)   | 5.7 (1.6)   | p<0.05 |
| Pain catastrophizing (PCS) (0-52)                           | 22.4 (11.3) | 21.3 (11.4) | 23.6 (11.1) | p<0.05 |
| PTSD (PCL-5) (0-80)                                         | 27.3 (19.5) | 26.0 (19.3) | 28.7 (19.6) | p<0.05 |

\*ttest or chisq test; (scale range)

## 198 PTSD symptoms and pain outcomes

199 Table 2 shows the standardized estimates, 95% confidence intervals (CI), and results from the  
200 regression models examining the association between PTSD symptoms and pain outcomes  
201 (catastrophizing, intensity, and interference). Results are shown for both the crude and the model adjusted  
202 for sociodemographic characteristics. Results from the adjusted models indicated that PTSD symptoms  
203 were associated with higher levels of pain catastrophizing (0.57, 95% CI [0.51, 0.63]), pain intensity

204 (0.30, 95% CI [0.24, 0.37]), and pain interference (0.46, 95% CI [0.39, 0.52]). No evidence suggesting  
 205 differences in this association were found in either the crude or adjusted models (all interaction p-  
 206 values<0.05).

207 **Table 2. Associations between PTSD symptoms and Pain Outcomes in Veterans**

208

|          | Pain Catastrophizing |              |                      | Pain Intensity |              |                      | Pain Interference |              |                      |
|----------|----------------------|--------------|----------------------|----------------|--------------|----------------------|-------------------|--------------|----------------------|
|          | $\beta$              | 95% CI       | Interaction p-value* | $\beta$        | 95% CI       | Interaction p-value* | $\beta$           | 95% CI       | Interaction p-value* |
| Crude    | 0.60                 | (0.55, 0.66) | 0.23                 | 0.33           | (0.26, 0.39) | 0.67                 | 0.47              | (0.41, 0.53) | 0.59                 |
| Adjusted | 0.57                 | (0.51, 0.63) | 0.22                 | 0.30           | (0.24, 0.37) | 0.58                 | 0.46              | (0.39, 0.52) | 0.68                 |

209

210 **Discussion**

211 This study investigated whether the associations between PTSD symptoms and pain  
 212 catastrophizing, intensity, and interference differed in an approximately equal sample of women and men  
 213 Veterans. While our bivariate results indicated higher average PTSD symptom scores, pain  
 214 catastrophizing, pain intensity, and pain interference in women Veterans, the multivariable results did not  
 215 provide evidence of gender differences in this association. Our results revealed that higher PTSD  
 216 symptoms had the strongest effect on elevated pain catastrophizing symptoms, followed by pain  
 217 interference and intensity in both men and women Veterans.

218 Co-morbidity between PTSD and chronic pain has been well documented in civilian (40) and  
 219 Veteran samples (4,41). Previous studies assessing the association between PTSD symptoms and pain  
 220 outcomes in cut-points among Veteran (predominantly men >80%) samples have observed overall higher  
 221 levels of pain catastrophizing, interference, and intensity (4,5,31,42). The inequity in the gender  
 222 distribution in these studies left unanswered questions regarding gender differences, given gendered  
 223 variability in the timing and type of trauma exposure(s) that resulted in PTSD symptoms (26,27). While  
 224 our results support previous findings, showing robust statistical associations between PTSD symptoms

225 and pain catastrophizing, interference, and intensity, we did not find evidence of gender differences in this  
226 association in our gender balanced sample (4,5,41,43).

227         The present study provides a unique contribution to the existing literature due to the size and  
228 approximately equal proportions of men and women Veterans that allowed tests of heterogeneity of  
229 effects in this association by gender. The ability to investigate gender differences regarding pain and  
230 PTSD in previous Veteran samples has been hampered by poor recruitment and retention of women in  
231 VA clinical trials, which typically average only 3-22% women (32,44). The lack of gender differences,  
232 may reflect the underlying mechanism of the mutual maintenance model whereby the sensation of pain  
233 could trigger PTSD symptoms (intrusions, avoidance, arousal), particularly if the trauma and pain are  
234 associated with the same event and this mechanism operates similarly in men and women (28,45). In the  
235 case of pain catastrophizing, this may reflect the tendency to magnify the threat value of pain, thereby  
236 increasing feelings of helplessness and difficulty inhibiting pain-related thoughts (46). Alternatively, the  
237 lack of gender differences in these associations may be in part due to the restriction that all Veterans in  
238 the current analysis needed to meet inclusion criteria for entry into the LAMP clinical trial, which may  
239 make them more similar compared to the overall Veteran patient population. Eligibility criteria for this  
240 clinical trial screened out those with recent diagnosis of a mental disorder (e.g., depression, suicidality),  
241 which may have resulted in a clinical sample that is less psychiatrically severe compared to a typical  
242 sample of Veterans seeking chronic pain care. These restrictions may obscure gender differences present  
243 in more psychiatrically severe patients with comorbid chronic pain conditions.

244         Elevated levels of pain catastrophizing, intensity, and interference in people with probable PTSD,  
245 highlight the need for interdisciplinary care modalities to target both PTSD and chronic pain symptoms.  
246 There have been mixed results regarding the efficacy of cognitive-based therapies in reducing comorbid  
247 PTSD and pain, with interventions generally demonstrating greater reduction in PTSD symptoms with  
248 little change in pain interference and intensity (41,47–49). Mindfulness-based therapies have  
249 demonstrated reductions in both PTSD and chronic pain outcomes, indicating their promise as an

250 effective treatment for people with comorbid PTSD and chronic pain (50–54). Finally, Veterans with  
251 comorbid chronic pain and PTSD may specifically benefit from integrated and trauma-informed treatment  
252 modalities that recognize the mutually reinforcing relationship between PTSD and pain (55). As the VA  
253 continues to develop and test multimodal care for Veterans with comorbid trauma and pain conditions,  
254 careful attention will be required to evaluate gender-sensitive treatment options (e.g. integrated into  
255 women’s clinic, online options) to ensure women Veterans feel comfortable accessing the required care to  
256 address these highly co-prevalent conditions (56,57).

257         This study contributes to the literature by assessing associations between probable PTSD and pain  
258 outcomes as well as findings related to gender differences in a Veteran population with highly prevalent  
259 PTSD and comorbid chronic pain. Some limitations must be considered when interpreting our results.  
260 First, our sample may differ from civilian samples in important ways. For example, compared to civilian  
261 samples, Veterans with chronic pain have higher average levels of PTSD symptoms (8). Additionally, we  
262 were unable to account for gender differences in the onset of trauma across the life-course (e.g., Adverse  
263 Childhood Experience, sexual assault, service-related exposures), where the timing, frequency, and  
264 severity may relate to the onset of chronic pain symptoms. Finally, this analysis was conducted on a  
265 sample of participants who volunteered to participate in a mindfulness study for chronic pain. Therefore,  
266 findings may not generalize to the broader population of Veterans with chronic pain. Despite these  
267 limitations, our study has several strengths, including completeness of data, including survey and  
268 electronic health record data from a large, diverse, and balanced sample of Veterans with chronic pain.  
269 Finally, this uniquely large and gender-balanced study cohort of Veterans allowed for analyses into  
270 potential gender differences in pain outcomes by the presence of probable PTSD.

## 271 **Conclusion**

272         This study found that PTSD symptoms were associated with elevated levels of pain  
273 catastrophizing, pain intensity, and pain interference in women and men Veterans. We did not find any  
274 statistically significant gender differences in the associations between PTSD symptoms and pain

275 outcomes. The unique gender composition of this sample created an opportunity to test these differences,  
276 addressing a limitation present in other Veteran samples. Our results contribute to research in Veterans  
277 aimed at understanding shared underlying mechanisms of this co-morbidity and testing relevant  
278 treatments that may concurrently benefit both chronic pain and PTSD.

## 279 **References**

- 280 1. Otis JD, Gregor K, Hardway C, Morrison J, Scioli E, Sanderson K. An examination of the co-  
281 morbidity between chronic pain and posttraumatic stress disorder on U.S. Veterans. *Psychol Serv.*  
282 2010 Aug;7(3):126–35.
- 283 2. Shapiro MO, Short NA, Raines AM, Franklin CL, True G, Constans JI. Pain and posttraumatic stress:  
284 Associations among women veterans with a history of military sexual trauma. *Psychol Trauma*  
285 *Theory Res Pract Policy.* 2022;No Pagination Specified-No Pagination Specified.
- 286 3. Bair MJ, Outcalt SD, Ang D, Wu J, Yu Z. Pain and Psychological Outcomes Among Iraq and  
287 Afghanistan Veterans with Chronic Pain and PTSD: ESCAPE Trial Longitudinal Results. *Pain Med.*  
288 2020 Jul 1;21(7):1369–76.
- 289 4. Benedict TM, Keenan PG, Nitz AJ, Moeller-Bertram T. Post-Traumatic Stress Disorder Symptoms  
290 Contribute to Worse Pain and Health Outcomes in Veterans With PTSD Compared to Those  
291 Without: A Systematic Review With Meta-Analysis. *Mil Med.* 2020 Oct;185(9–10):E1481–91.
- 292 5. Outcalt SD, Ang DC, Wu J, Sargent C, Yu Z, Bair MJ. Pain experience of Iraq and Afghanistan  
293 Veterans with comorbid chronic pain and posttraumatic stress. *J Rehabil Res Dev.* 2014;51(4):559–  
294 70.
- 295 6. Frayne SM, Phibbs CS, Saechao, F. Sourcebook: Women Veterans in the Veterans Health  
296 Administration, Volume 4, Longitudinal Trends in Sociodemographics, Utilization, Health Profile,  
297 and Geographic Distribution [Internet]. 2018 Feb [cited 2022 Nov 8] p. 144. Available from:  
298 [https://www.womenshealth.va.gov/docs/WHS\\_Sourcebook\\_Vol-IV\\_508c.pdf](https://www.womenshealth.va.gov/docs/WHS_Sourcebook_Vol-IV_508c.pdf)
- 299 7. Haskell SG, Brandt CA, Krebs EE, Skanderson M, Kerns RD, Goulet JL. Pain among Veterans of  
300 Operations Enduring Freedom and Iraqi Freedom: Do Women and Men Differ? *Pain Med Malden*  
301 *Mass.* 2009;10(7):1167–73.
- 302 8. Lehavot K, Katon JG, Chen JA, Fortney JC, Simpson TL. Post-traumatic Stress Disorder by Gender  
303 and Veteran Status. *Am J Prev Med.* 2018 Jan;54(1):e1–9.
- 304 9. Nahin RL. Severe Pain in Veterans: The Effect of Age and Sex, and Comparisons With the General  
305 Population. *J Pain.* 2017 Mar;18(3):247–54.
- 306 10. How Common is PTSD in Veterans? - PTSD: National Center for PTSD [Internet]. [cited 2023 May  
307 10]. Available from: [https://www.ptsd.va.gov/understand/common/common\\_veterans.asp](https://www.ptsd.va.gov/understand/common/common_veterans.asp)
- 308 11. Andrew R, Derry S, Taylor RS, Straube S, Phillips CJ. The Costs and Consequences of Adequately  
309 Managed Chronic Non-Cancer Pain and Chronic Neuropathic Pain. *Pain Pract.* 2014;14(1):79–94.

- 310 12. Gaskin DJ, Richard P. The Economic Costs of Pain in the United States. *J Pain*. 2012;13(8):715–24.
- 311 13. Treede RD, Rief W, Barke A, Aziz Q, Bennett MI, Benoliel R, et al. Chronic pain as a symptom or a  
312 disease: the IASP Classification of Chronic Pain for the International Classification of Diseases  
313 (ICD-11). *Pain*. 2019 Jan;160(1):19–27.
- 314 14. Voon P, Karamouzian M, Kerr T. Chronic pain and opioid misuse: a review of reviews. *Subst Abuse*  
315 *Treat Prev Policy*. 2017 Aug 15;12:36.
- 316 15. Haskell SG, Heapy A, Reid MC, Papas RK, Kerns RD. The Prevalence and Age-Related  
317 Characteristics of Pain in a Sample of Women Veterans Receiving Primary Care. *J Womens Health*.  
318 2006 Sep;15(7):862–9.
- 319 16. Higgins DM, Fenton BT, Driscoll MA, Heapy AA, Kerns RD, Bair MJ, et al. Gender Differences in  
320 Demographic and Clinical Correlates among Veterans with Musculoskeletal Disorders. *Womens*  
321 *Health Issues*. 2017 Jul;27(4):463–70.
- 322 17. Teh CF, Kilbourne AM, McCarthy JF, Welsh D, Blow FC. Gender Differences in Health-Related  
323 Quality of Life for Veterans With Serious Mental Illness. 2008;59(6).
- 324 18. Keefe FJ, Lefebvre JC, Egert JR, Affleck G, Sullivan MJ, Caldwell DS. The relationship of gender to  
325 pain, pain behavior, and disability in osteoarthritis patients: the role of catastrophizing. *Pain*. 2000  
326 Aug 1;87(3):325–34.
- 327 19. Keogh E, Boerner KE. Exploring the relationship between male norm beliefs, pain-related beliefs and  
328 behaviours: An online questionnaire study. *Eur J Pain*. 2020;24(2):423–34.
- 329 20. Mattocks K, Casares J, Brown A, Bean-Mayberry B, Goldstein KM, Driscoll M, et al. Women  
330 Veterans' Experiences with Perceived Gender Bias in U.S. Department of Veterans Affairs Specialty  
331 Care. *Womens Health Issues Off Publ Jacobs Inst Womens Health*. 2020 Apr;30(2):113–9.
- 332 21. Naylor JC, Wagner HR, Johnston C, Elbogen EE, Brancu M, Marx CE, et al. Pain Intensity and Pain  
333 Interference in Male and Female Iraq/Afghanistan-era Veterans. *Womens Health Issues*. 2019 Jun  
334 25;29:S24–31.
- 335 22. Sullivan MJL, Tripp DA, Santor D. Gender Differences in Pain and Pain Behavior: The Role of  
336 Catastrophizing. *Cogn Ther Res*. 2000 Feb 1;24(1):121–34.
- 337 23. AP Association. Diagnostic and statistical manual of mental disorders: DSM-IV-TR. *Am Psychiatr*  
338 *Pub*. 2000;157.
- 339 24. McCall-Hosenfeld JS, Mukherjee S, Lehman EB. The Prevalence and Correlates of Lifetime  
340 Psychiatric Disorders and Trauma Exposures in Urban and Rural Settings: Results from the National  
341 Co-morbidity Survey Replication (NCS-R). *PLoS ONE*. 2014 Nov 7;9(11):e112416.
- 342 25. Street AE, Vogt D, Dutra L. A new generation of women veterans: Stressors faced by women  
343 deployed to Iraq and Afghanistan. *Clin Psychol Rev*. 2009 Dec 1;29(8):685–94.
- 344 26. Vogt D, Vaughn R, Glickman ME, Schultz M, Drainoni ML, Elwy R, et al. Gender differences in  
345 combat-related stressors and their association with postdeployment mental health in a nationally  
346 representative sample of U.S. OEF/OIF veterans. *J Abnorm Psychol*. 2011 Nov;120(4):797–806.

- 347 27. Driscoll MA, Higgins DM, Seng EK, Buta E, Goulet JL, Heapy AA, et al. Trauma, Social Support,  
348 Family Conflict, and Chronic Pain in Recent Service Veterans: Does Gender Matter? *Pain Med*  
349 Malden Mass. 2015;16(6):1101–11.
- 350 28. Asmundson GJ, Coons MJ, Taylor S, Katz J. PTSD and the Experience of Pain: Research and  
351 Clinical Implications of Shared Vulnerability and Mutual Maintenance Models. *Can J Psychiatry*.  
352 2002 Dec 1;47(10):930–7.
- 353 29. Sharp TJ, Harvey AG. Chronic pain and posttraumatic stress disorder: mutual maintenance? *Clin*  
354 *Psychol Rev*. 2001 Aug 1;21(6):857–77.
- 355 30. McAndrew LM, Lu SE, Phillips LA, Maestro K, Quigley KS. Mutual maintenance of PTSD and  
356 physical symptoms for Veterans returning from deployment. *Eur J Psychotraumatology*. 2019 Dec  
357 31;10(1):1608717.
- 358 31. Outcalt SD, Kroenke K, Krebs EE, Chumbler NR, Wu J, Yu Z, et al. Chronic pain and comorbid  
359 mental health conditions: independent associations of posttraumatic stress disorder and depression  
360 with pain, disability, and quality of life. *J Behav Med*. 2015 Jun;38(3):535–43.
- 361 32. Danan ER, Ullman K, Klap RS, Yano EM, Krebs EE. Evidence Map: Reporting of Results by Sex or  
362 Gender in Randomized, Controlled Trials with Women Veteran Participants (2008 to 2018). *Womens*  
363 *Health Issues Off Publ Jacobs Inst Womens Health*. 2019 Jun 25;29 Suppl 1(Suppl 1):S112–20.
- 364 33. Burgess DJ, Evans R, Allen KD, Bangerter, A, Bronfort G, Cross LJ, et al. Learning to Apply  
365 Mindfulness to Pain (LAMP): Design for a Pragmatic Clinical Trial of Two Mindfulness-Based  
366 Interventions for Chronic Pain. *Pain Med*. 2020 Dec 12;21(Supplement\_2):S29–36.
- 367 34. Bovin MJ, Marx BP, Weathers FW, Gallagher MW, Rodriguez P, Schnurr PP, et al. Psychometric  
368 properties of the PTSD Checklist for Diagnostic and Statistical Manual of Mental Disorders-Fifth  
369 Edition (PCL-5) in veterans. *Psychol Assess*. 2016 Nov;28(11):1379–91.
- 370 35. Using the PTSD Checklist for DSM-5 (PCL-5).
- 371 36. Sullivan MJL, Bishop SR, Pivik J. The Pain Catastrophizing Scale: Development and validation.  
372 *Psychol Assess*. 1995 Dec;7(4):524–32.
- 373 37. Cleeland CS, Ryan KM. Pain assessment: Global use of the Brief Pain Inventory. *Ann Acad Med*  
374 *Singap*. 1994;23(2):129–38.
- 375 38. Keller S, Bann CM, Dodd SL, Schein J, Mendoza TR, Cleeland CS. Validity of the Brief Pain  
376 Inventory for Use in Documenting the Outcomes of Patients With Noncancer Pain: *Clin J Pain*.  
377 2004;20(5):309–18.
- 378 39. Goldsmith ES, Taylor BC, Greer N, Murdoch M, MacDonald R, McKenzie L, et al. Focused  
379 Evidence Review: Psychometric Properties of Patient-Reported Outcome Measures for Chronic  
380 Musculoskeletal Pain. *J Gen Intern Med*. 2018 May;33(Suppl 1):61–70.
- 381 40. Slawek DE, Syed M, Cunningham CO, Zhang C, Ross J, Herman M, et al. Pain catastrophizing and  
382 mental health phenotypes in adults with refractory chronic pain: A latent class analysis. *J Psychiatr*  
383 *Res*. 2021 Dec 2;145:102–10.



- 384 41. Goldstein E, McDonnell C, Atchley R, Dorado K, Bedford C, Brown RL, et al. The Impact of  
385 Psychological Interventions on Posttraumatic Stress Disorder and Pain Symptoms: A Systematic  
386 Review and Meta-Analysis. *Clin J Pain*. 2019 Aug;35(8):703–12.
- 387 42. Alschuler KN, Otis JD. Coping strategies and beliefs about pain in veterans with comorbid chronic  
388 pain and significant levels of posttraumatic stress disorder symptoms. *Eur J Pain Lond Engl*. 2012  
389 Feb;16(2):312–9.
- 390 43. Asmundson GJG, Wright KD, Stein MB. Pain and PTSD symptoms in female veterans. *Eur J Pain*.  
391 2004 Aug 1;8(4):345–50.
- 392 44. Goldstein KM, Duan-Porter W, Alkon A, Olsen MK, Voils CI, Hastings SN. Enrollment and  
393 Retention of Men and Women in Health Services Research and Development Trials. *Womens Health*  
394 *Issues Off Publ Jacobs Inst Womens Health*. 2019 Jun 25;29 Suppl 1(Suppl 1):S121–30.
- 395 45. Brennstuhl MJ, Tarquinio C, Montel S. Chronic Pain and PTSD: Evolving Views on Their  
396 Comorbidity: Chronic Pain and PTSD: Evolving Views on Their Comorbidity. *Perspect Psychiatr*  
397 *Care*. 2015 Oct;51(4):295–304.
- 398 46. Quartana PJ, Campbell CM, Edwards RR. Pain catastrophizing: a critical review. *Expert Rev*  
399 *Neurother*. 2009 May;9(5):745–58.
- 400 47. Dunne RL, Kenardy J, Sterling M. A Randomized Controlled Trial of Cognitive-behavioral Therapy  
401 for the Treatment of PTSD in the Context of Chronic Whiplash. *Clin J Pain*. 2012 Nov;28(9):755–65.
- 402 48. Beck JG, Coffey SF, Foy DW, Keane TM, Blanchard EB. Group Cognitive Behavior Therapy for  
403 Chronic Posttraumatic Stress Disorder: An Initial Randomized Pilot Study. *Behav Ther*. 2009  
404 Mar;40(1):82–92.
- 405 49. Jull G, Kenardy J, Hendrikz J, Cohen M, Sterling M. Management of acute whiplash: A randomized  
406 controlled trial of multidisciplinary stratified treatments. *Pain*. 2013 Sep;154(9):1798–806.
- 407 50. Plagge JM, Lu MW, Lovejoy TI, Karl AI, Dobscha SK. Treatment of Comorbid Pain and PTSD in  
408 Returning Veterans: A Collaborative Approach Utilizing Behavioral Activation. *Pain Med*. 2013 Aug  
409 1;14(8):1164–72.
- 410 51. Okvat HA, Davis MC, Mistretta EG, Mardian AS. Mindfulness-based training for women veterans  
411 with chronic pain: A retrospective study. *Psychol Serv*. 2022;19(Suppl 1):106–19.
- 412 52. King AP, Block SR, Sripada RK, Rauch SAM, Porter KE, Favorite TK, et al. A Pilot Study of  
413 Mindfulness-Based Exposure Therapy in OEF/OIF Combat Veterans with PTSD: Altered Medial  
414 Frontal Cortex and Amygdala Responses in Social–Emotional Processing. *Front Psychiatry*  
415 [Internet]. 2016 Sep 20 [cited 2023 Jun 16];7. Available from:  
416 <http://journal.frontiersin.org/Article/10.3389/fpsy.2016.00154/abstract>
- 417 53. Schure MB, Simpson TL, Martinez M, Sayre G, Kearney DJ. Mindfulness-Based Processes of  
418 Healing for Veterans with Post-Traumatic Stress Disorder. *J Altern Complement Med*. 2018  
419 Nov;24(11):1063–8.

- 420 54. Marchand WR, Sandoval K, Lackner R, Parker SC, Herrmann T, Yabko B, et al. Mindfulness-based  
421 interventions for military veterans: A systematic review and analysis of the literature. *Complement*  
422 *Ther Clin Pract.* 2021 Feb;42:101274.
- 423 55. Pebole M, Gobin RL, Hall KS. Trauma-informed exercise for women survivors of sexual violence.  
424 *Transl Behav Med.* 2021 Mar 16;11(2):686–91.
- 425 56. Fenwick KM, Golden RE, Frayne SM, Hamilton AB, Yano EM, Carney DV, et al. Women Veterans’  
426 Experiences of Harassment and Perceptions of Veterans Affairs Health Care Settings During a  
427 National Anti-Harassment Campaign. *Womens Health Issues.* 2021 Nov;31(6):567–75.
- 428 57. Kelly U, Haywood T, Segell E, Higgins M. Trauma-Sensitive Yoga for Post-Traumatic Stress  
429 Disorder in Women Veterans who Experienced Military Sexual Trauma: Interim Results from a  
430 Randomized Controlled Trial. *J Altern Complement Med.* 2021 Mar 1;27(S1):S-45-S-59.
- 431
